# Supplementary material for: NiS–MoS2 hetero-nanosheet array electrocatalysts for efficient overall water splitting
Source: Royal Society of Chemistry journal article supplement (doi:10.1039/c9se00228f), 2019-01-01
Supplement: c9se00228f1.pdf [file c9se00228f1.pdf]

## Electronic Supplementary Information

### **NiS-MoS<sub>2</sub> hetero-nanosheet arrays electrocatalysts for efficient overall water splitting**

**Shundong Guan,<sup>ab</sup> Xiuli Fu,<sup>\*a</sup> Zhezhu Lao,<sup>c</sup> Chuanhong Jin<sup>c</sup> and Zhijian Peng<sup>\*b</sup>**

*<sup>a</sup> State Key Laboratory of Information Photonics and Optical Communications, and School of Science, Beijing University of Posts and Telecommunications, Beijing 100876, P.R. China)*

*<sup>b</sup> School of Science, China University of Geosciences, Beijing 100083, P.R. China*

*<sup>c</sup> State Key Laboratory of Silicon Materials, School of Materials Science and Engineering, Zhejiang University, Hangzhou, Zhejiang 310027, China*

\*xiulifu@bupt.edu.cn. Tel: 86-10-62282242. Fax: 86-10-62282242.

\*pengzhijian@cugb.edu.cn. Tel: 86-10-82320255; Fax: 86-10-82322624.

Financial support from the National Natural Science Foundation of China (grant nos. 11674035 and 61274015), and Excellent Ph.D. Students Foundation in Beijing University of Posts and Communications (grant no. CX2018214) is gratefully acknowledged.

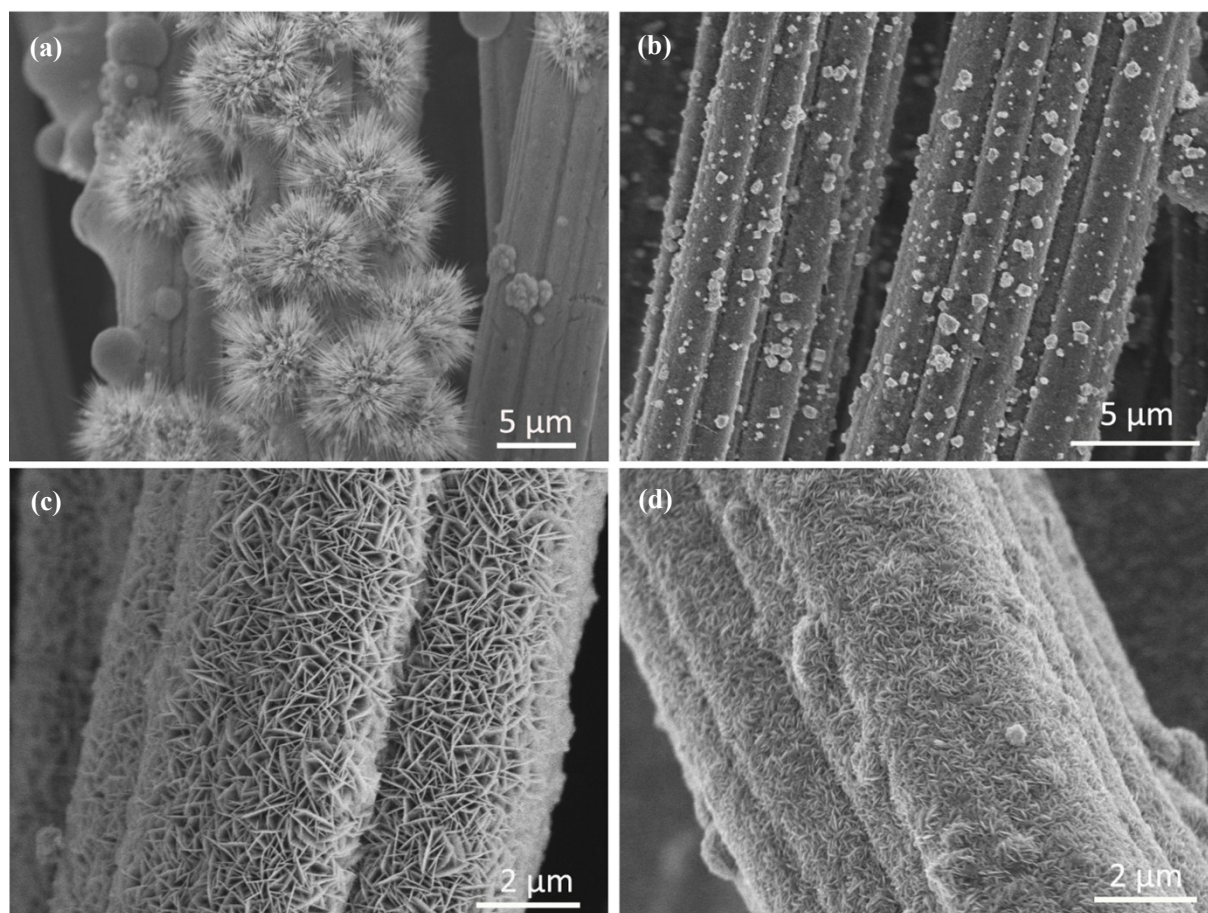

**Fig. S1 SEM images** of NiS-MoS<sub>2</sub> nanostructures on CC synthesized with different concentrations of sodium dodecyl sulfate (SDS): (a) 0, (b) 0.1, (c) 0.2, and (d) 0.3 mol·L<sup>-1</sup>.

In order to investigate the function of SDS for the formation of NiS-MoS<sub>2</sub> HNSAs, different concentrations of SDS were used during the hydrothermal synthesis. Without SDS in the solution, some urchin-like nanostructures were formed independently on the CC (**Fig. S1a**), indicating that NiS and MoS<sub>2</sub> couldn't uniformly grow on the surface of CC due to the poor wettability of carbon in aqueous solution. Similarly, when a low concentration (0.1 mol·L<sup>-1</sup>) of SDS was used, only some nanoparticles were formed, decorating on the CC (**Fig. S1b**). However, when 0.2 mol·L<sup>-1</sup> SDS was applied, many large nanosheets were uniformly and vertically aligned as nanowalls on the CC (**Fig. S1c**). By further increasing the concentration of SDS to 0.3 mol·L<sup>-1</sup>, the formed nanosheets were aggregated together but had a smaller size (**Fig. S1d**). Thus, 0.2 mol·L<sup>-1</sup> of SDS was optimized for the synthesis of NiS-MoS<sub>2</sub> HNSAs.

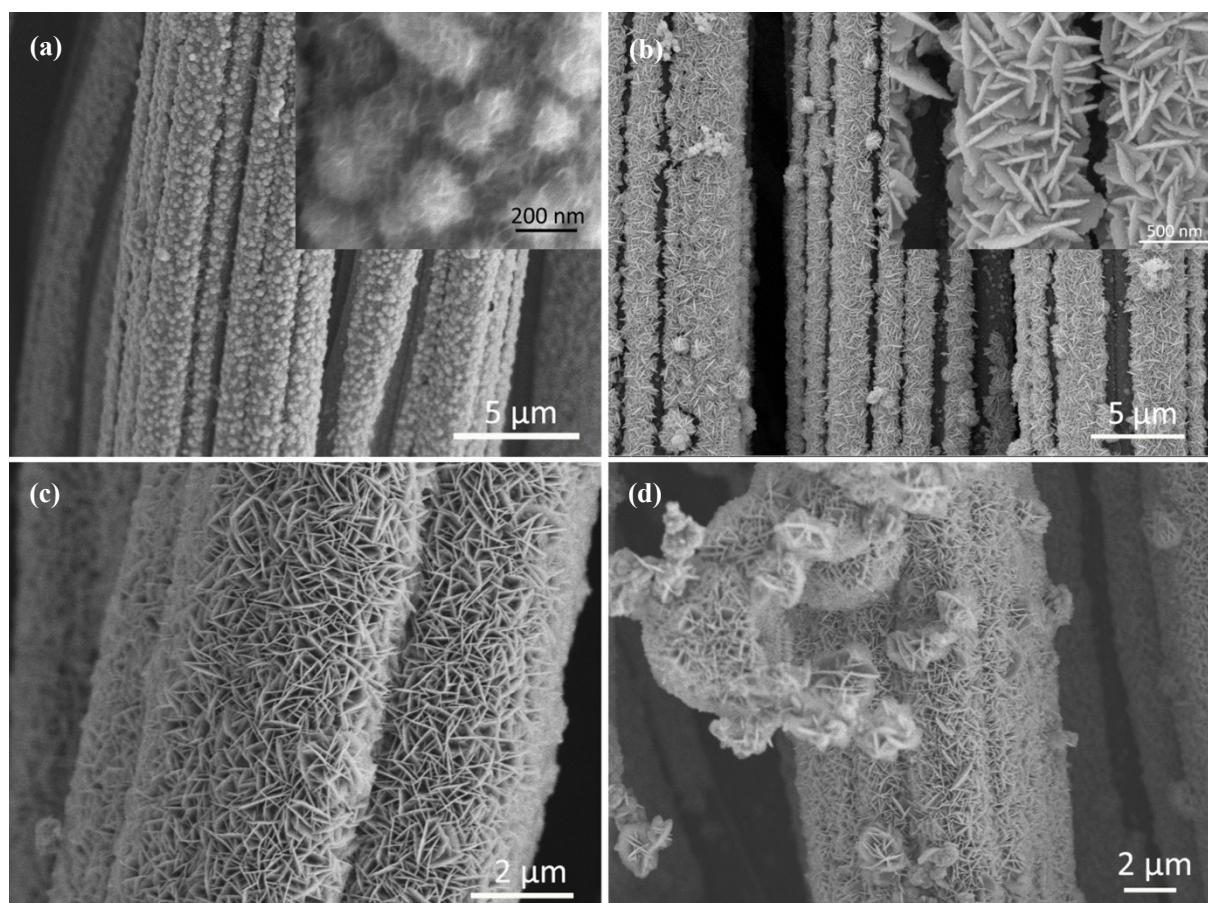

**Fig. S2 SEM images** of NiS-MoS<sub>2</sub> nanostructures on CC synthesized at 180 °C for different times: (a) 4, (b) 6, (c) 9 and (d) 12 h. The insets in (a) and (b) are their corresponding high-magnification SEM images, respectively.

As is seen in **Fig. S2a**, after 4 h hydrothermal reaction, many flower-like nanosheets have formed on the surface of CC. These tiny-flowers would continually grow larger and interconnect with each other with the extension of reaction time, and wall-like nanosheets with higher thickness appeared (**Fig. S2b**). After 9 h reaction, the optimized NiS-MoS<sub>2</sub> HNSAs with large size were obtained (**Fig. S2c**). By further extending the reaction time to 12 h, more of large-sized flower-like NiS-MoS<sub>2</sub> hierarchical nanostructures would separately grow onto the as-formed nanosheets array (**Fig. S2d**).

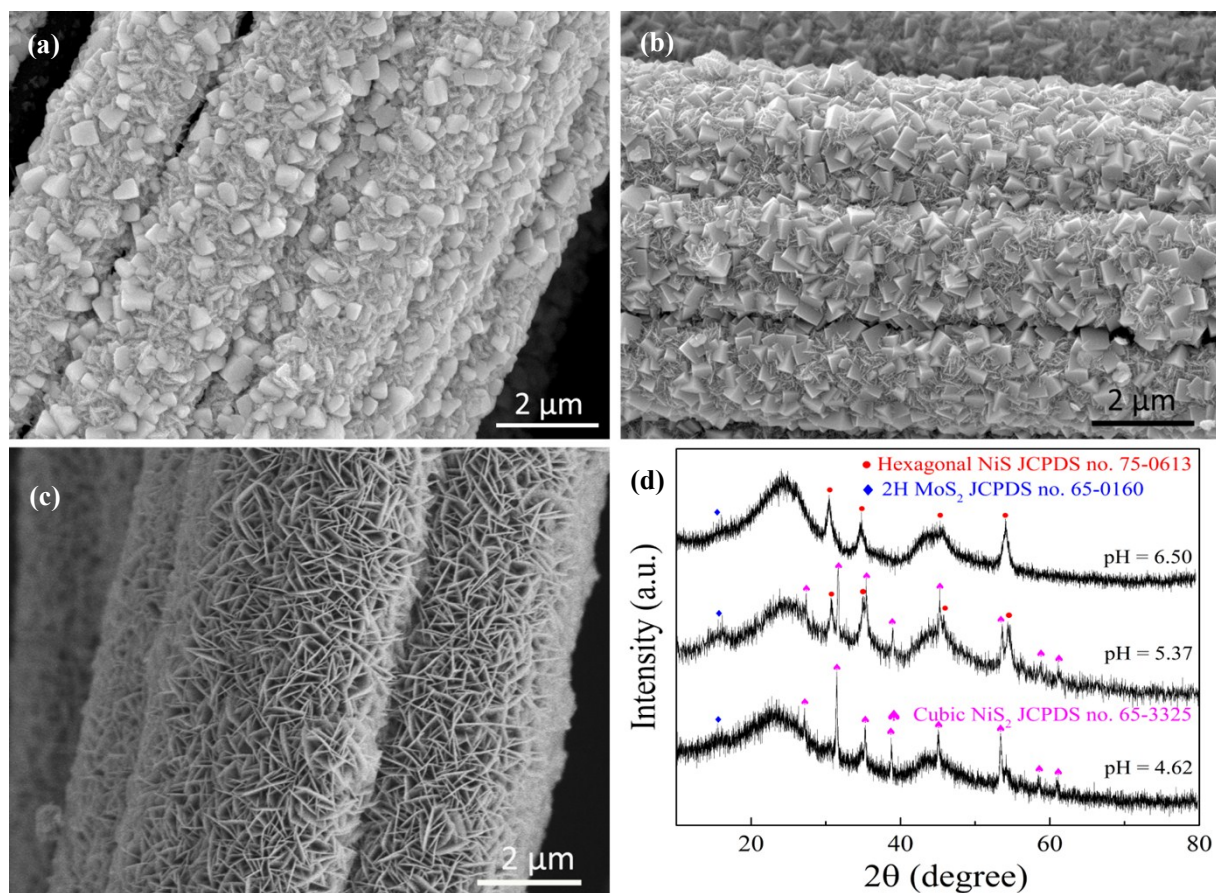

**Fig. S3 SEM images** of NiS-MoS<sub>2</sub> nanostructures on CC synthesized at different pH values: (a) 4.62 (adjusted by adding HCl), (b) 5.37 (pristine solution) and (c) 6.50 (adjusted by adding NaOH). (d) Their corresponding XRD patterns.

As shown in **Fig. S3a-b**, under acidic conditions, many cubic particles were formed. But under alkaline conditions, a plenty of vertically aligned nanosheets were obtained (**Fig. S3c**). From **Fig. S3d**, it can be seen that, as the reaction solution was changed from acid to nearly near-neutral, the phase of nickel sulfide would be transformed from cubic NiS<sub>2</sub> to hexagonal NiS, while that of MoS<sub>2</sub> would not be varied. These results reveal that a nearly neutral condition could facilitate the formation of hexagonal NiS nanosheets, but an acidic one could be beneficial for the formation of cubic NiS<sub>2</sub> nanoparticles.

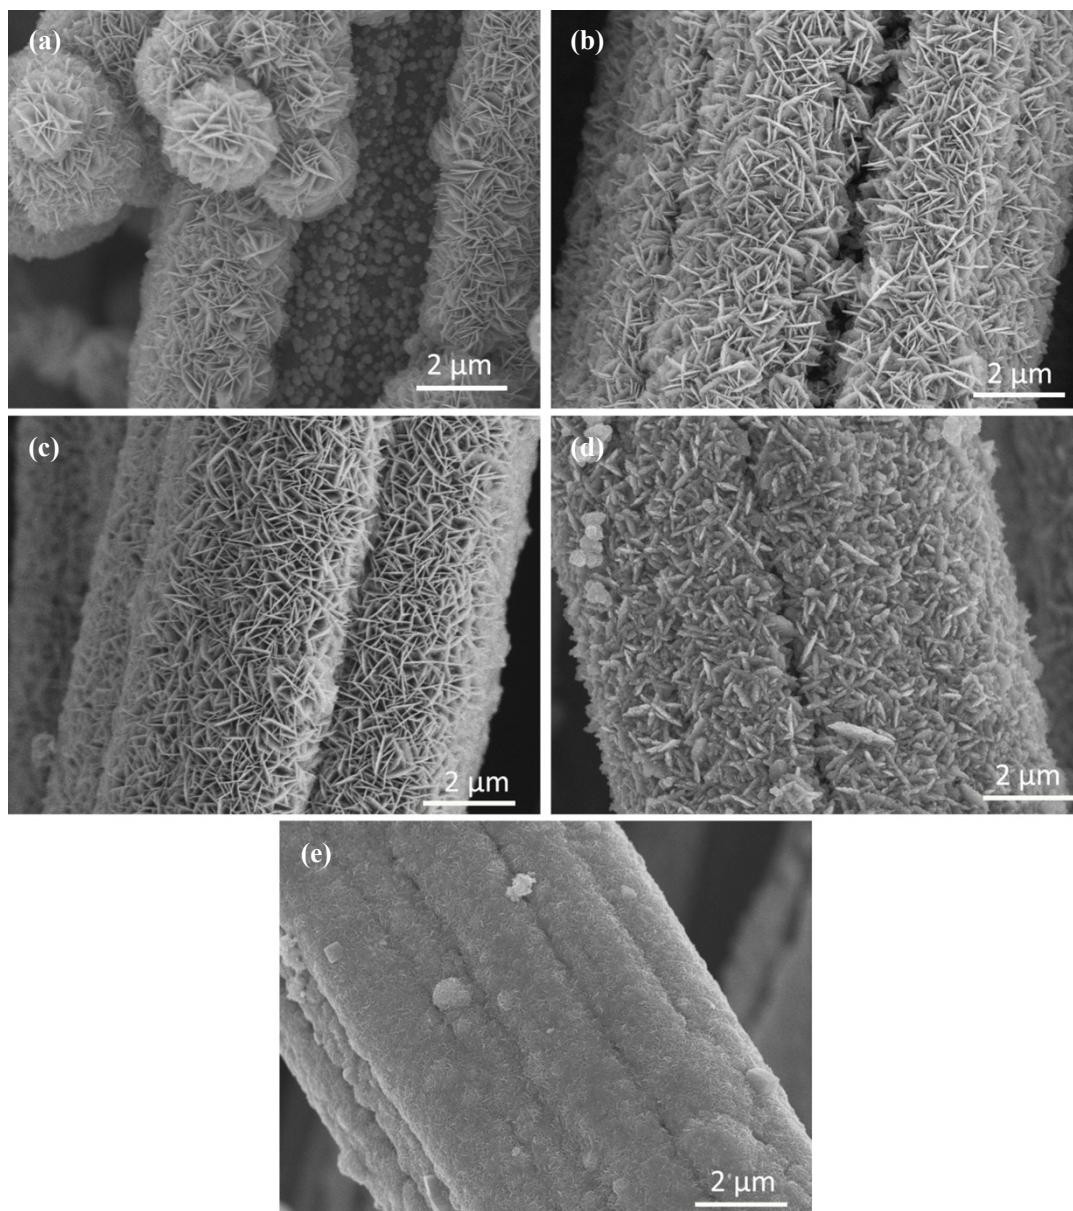

**Fig. S4 SEM images** of NiS-MoS<sub>2</sub> nanostructures on CC synthesized with different Mo/Ni feed molar ratios: (a) 0.23, (b) 0.47, (c) 0.7, (d) 0.93 and (e) 1.4.

As is seen from **Fig. S4**, when a small Mo/Ni feed molar ratio (0.23-0.47) was applied for the growth of NiS-MoS<sub>2</sub> nanostructures, the coating of catalysts was neither complete nor uniform on the CC. However, when a large Mo/Ni feed molar ratio (0.93-1.4) was utilized, the structure became too dense and the size of nanosheets was reduced. Thus, a moderate Mo/Ni feed molar ratio of 0.7 was selected for the growth of uniform NiS-MoS<sub>2</sub> HNSAs.

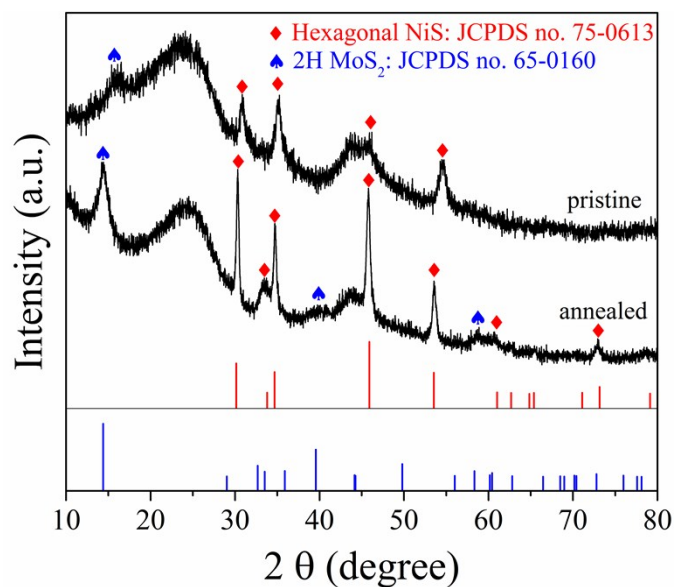

**Fig. S5 XRD patterns** of the NiS-MoS<sub>2</sub> HNSAs/CC before and after annealing.

From **Fig. S5**, it can be seen that after a simple annealing at 500 °C in N<sub>2</sub> atmosphere, all the diffraction peaks of the prepared NiS-MoS<sub>2</sub> HNSAs/CC became sharper than those of the pristine sample, which are matching better with the standard XRD patterns of NiS (JCPDS no. 75-0613) and MoS<sub>2</sub> (JCPDS no. 65-0160). These results indicate that the crystallinity of NiS-MoS<sub>2</sub> HNSAs/CC could be improved after annealing.

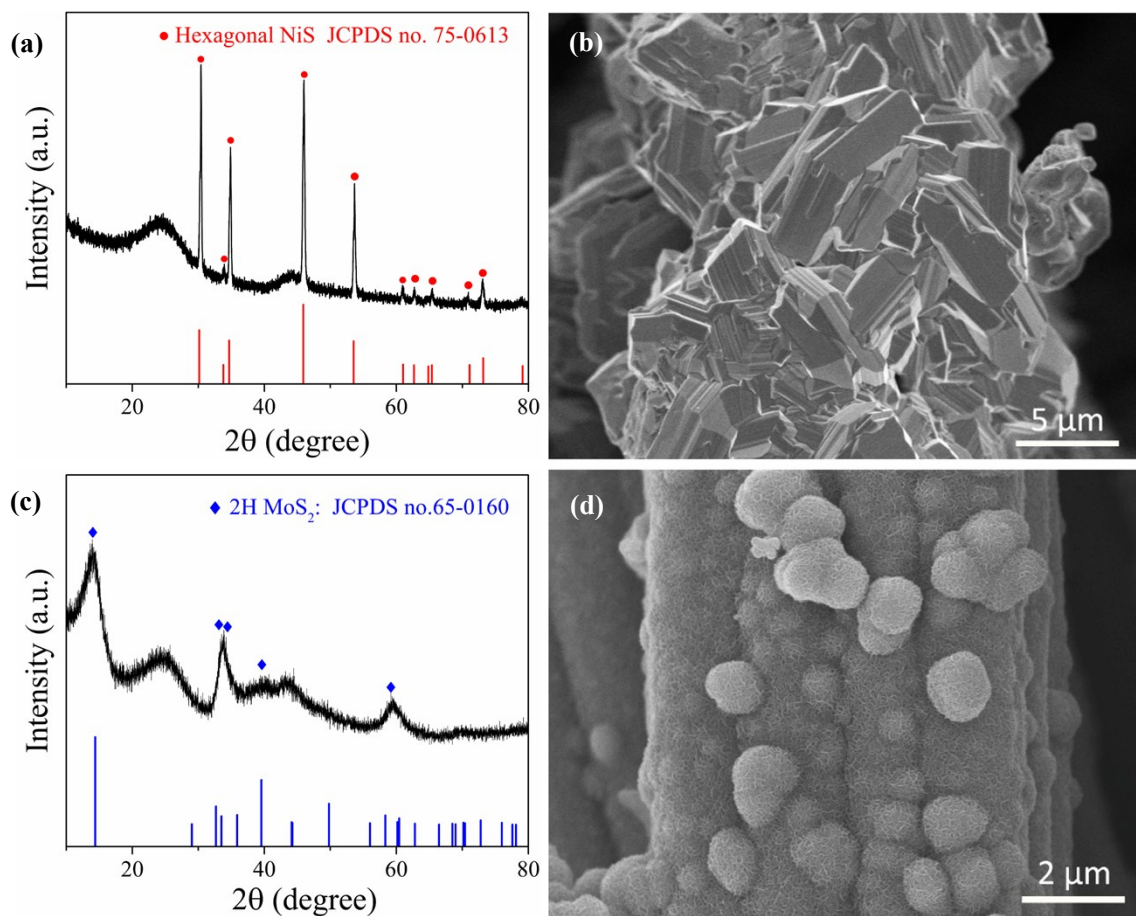

**Fig. S6** XRD patterns, and the corresponding SEM images of pure NiS (a, b) and pure MoS<sub>2</sub> (c, d) nanostructures on the CC.

As comparative samples for NiS-MoS<sub>2</sub> HNSAs, pure NiS and MoS<sub>2</sub> were also grown on CC *via* a similar process, respectively, and then annealed under the same conditions. **Fig. S6a** indicates that the obtained NiS nanostructures are of pure hexagonal NiS phase, and **Fig. S6b** reveals that many large nanoparticles with a diameter more than 3 μm were aggregated together, wrapping the CC. These results confirm the robust growth of NiS in the absence of restrictive effect due to the growth of MoS<sub>2</sub>. For the pure MoS<sub>2</sub> sample, all the diffraction peaks can be indexed to those of 2H MoS<sub>2</sub> phase, and the wide peaks indicate the relatively poor crystallinity of MoS<sub>2</sub> (**Fig. S6c**). Moreover, a layer of tiny nanosheets is uniformly coating the CC, revealing that the MoS<sub>2</sub> nanostructured sheets couldn't grow larger without the presence of NiS (**Fig. S6d**). Thus, the synthesis of the present NiS-MoS<sub>2</sub> HNSAs should be controlled by a collaborative growth process between NiS and MoS<sub>2</sub>.

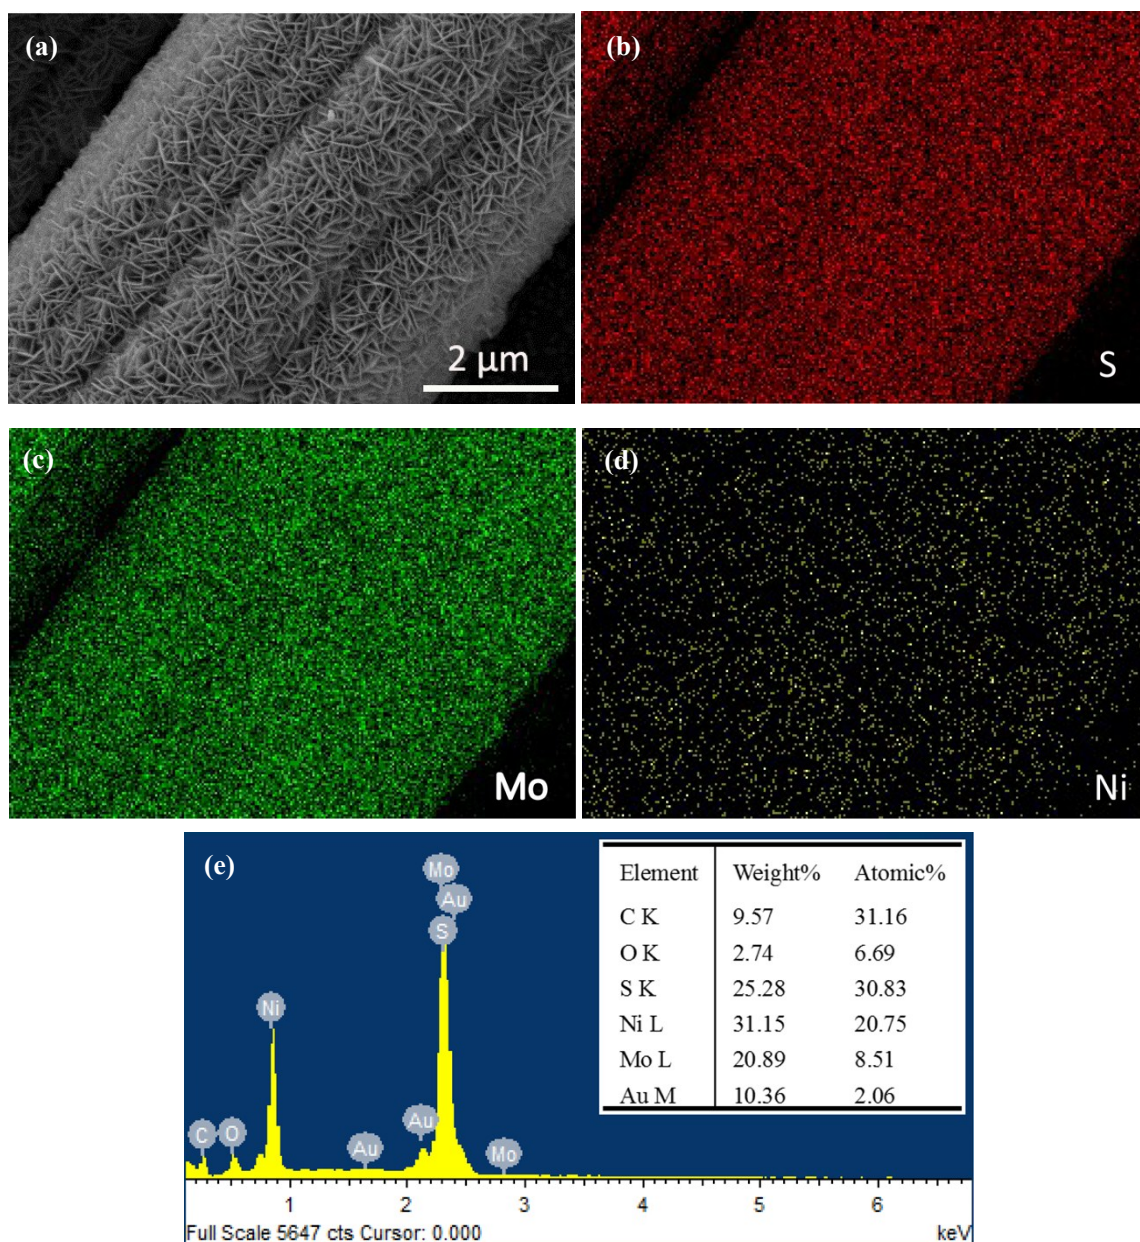

**Fig. S7 EDX results.** (a) Typical SEM image and the corresponding mapping spectra of S (b), Mo (c) and Ni (d) elements. (e) EDX spectrum of the NiS-MoS<sub>2</sub> HNSAs/CC, in which the inset is the table of element contents.

From **Fig. S7**, it can be seen that S, Mo and Ni elements are all existing over the whole surface of carbon fiber, indicating that NiS and MoS<sub>2</sub> are uniformly distributing on the carbon cloth (CC). It should be noted that, for the EDX spectrum, Au atoms originate from the sprayed gold during the preparation of SEM samples; and O atoms might be derived from the adsorbed O<sub>2</sub> or H<sub>2</sub>O on the sample. In addition, the molar percentage of MoS<sub>2</sub> in the prepared NiS-MoS<sub>2</sub> heterostructures was calculated as about 29.1%.



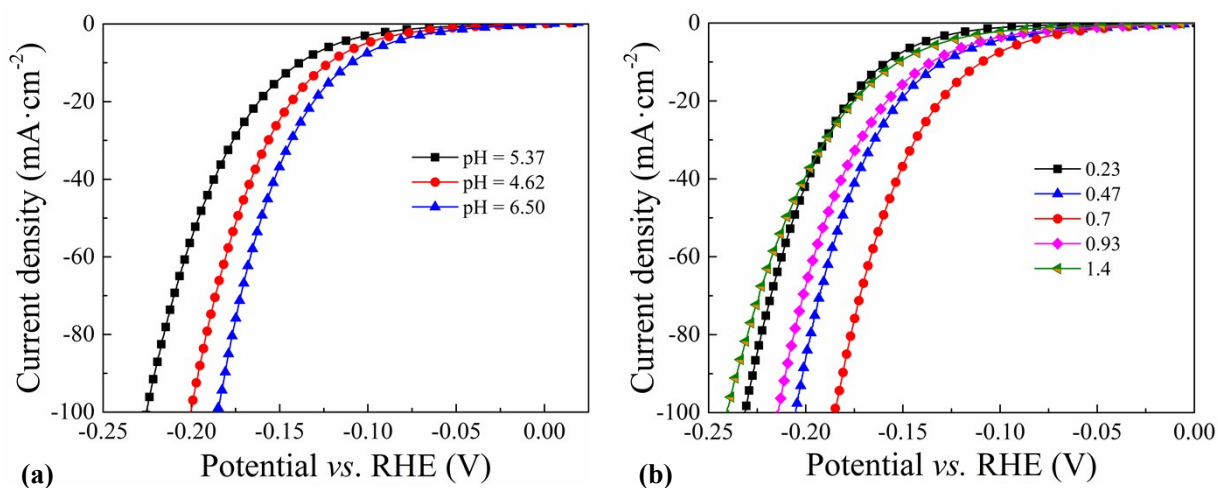

**Fig. S8 Polarization curves** of NiS-MoS<sub>2</sub> nanostructures on CC synthesized at different pH values (a) and with different Mo/Ni feed molar ratios (b), respectively. Electrolyte: 1 mol·L<sup>-1</sup> KOH aqueous solution; and scan rate: 5 mV·s<sup>-1</sup>.

From **Fig. S8**, it can be seen that, the NiS-MoS<sub>2</sub> nanostructures on CC synthesized under the optimal conditions (at pH = 6.50 and with a Mo/Ni feed molar ratio of 0.7) present the highest performance for hydrogen evolution reaction (HER).

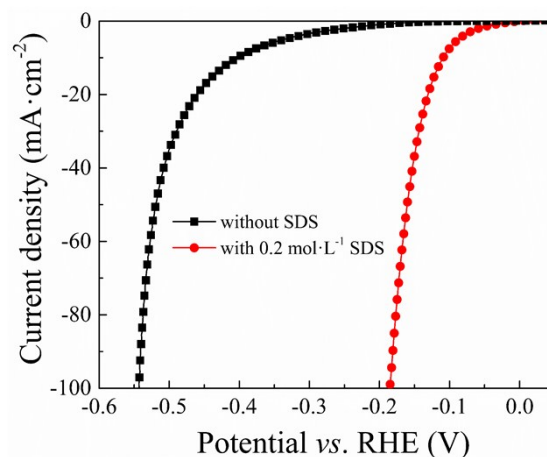

**Fig. S9 Polarization curves** of NiS-MoS<sub>2</sub> nanostructures on CC synthesized with and without SDS. Electrolyte: 1 mol·L<sup>-1</sup> KOH aqueous solution; and scan rate: 5 mV·s<sup>-1</sup>.

It is seen that the NiS-MoS<sub>2</sub>/CC composite synthesized without SDS shows a much higher overpotential for HER than the heterostructures fabricated with 0.2 mol·L<sup>-1</sup> SDS, probably because without the assistance of SDS, the NiS and MoS<sub>2</sub> couldn't effectively and uniformly grown on to the CC substrate. As a result, the product couldn't provide enough electrochemical active species for efficient HER.

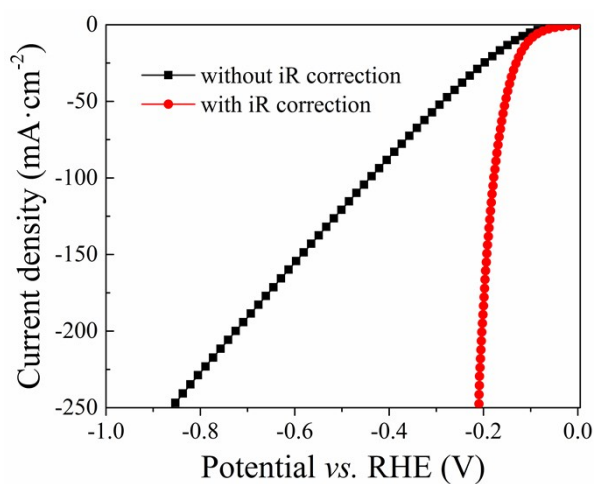

**Fig. S10 Polarization curves** of the present NiS-MoS<sub>2</sub> HNSAs/CC in 1 mol·L<sup>-1</sup> KOH aqueous solution with and without *iR* correction.

From the polarization curve without *iR* correction, it can be calculated that the overpotentials at a current density of -10 and -250 mA·cm<sup>-1</sup> are about 135 and 860 mV, respectively. After the *iR* correction, the cathodic current goes up sharply with the increase of applied potential, and the overpotentials at the current density of -10 and -250 mA·cm<sup>-1</sup> are dramatically decreased to 106 and 200 mV, respectively.

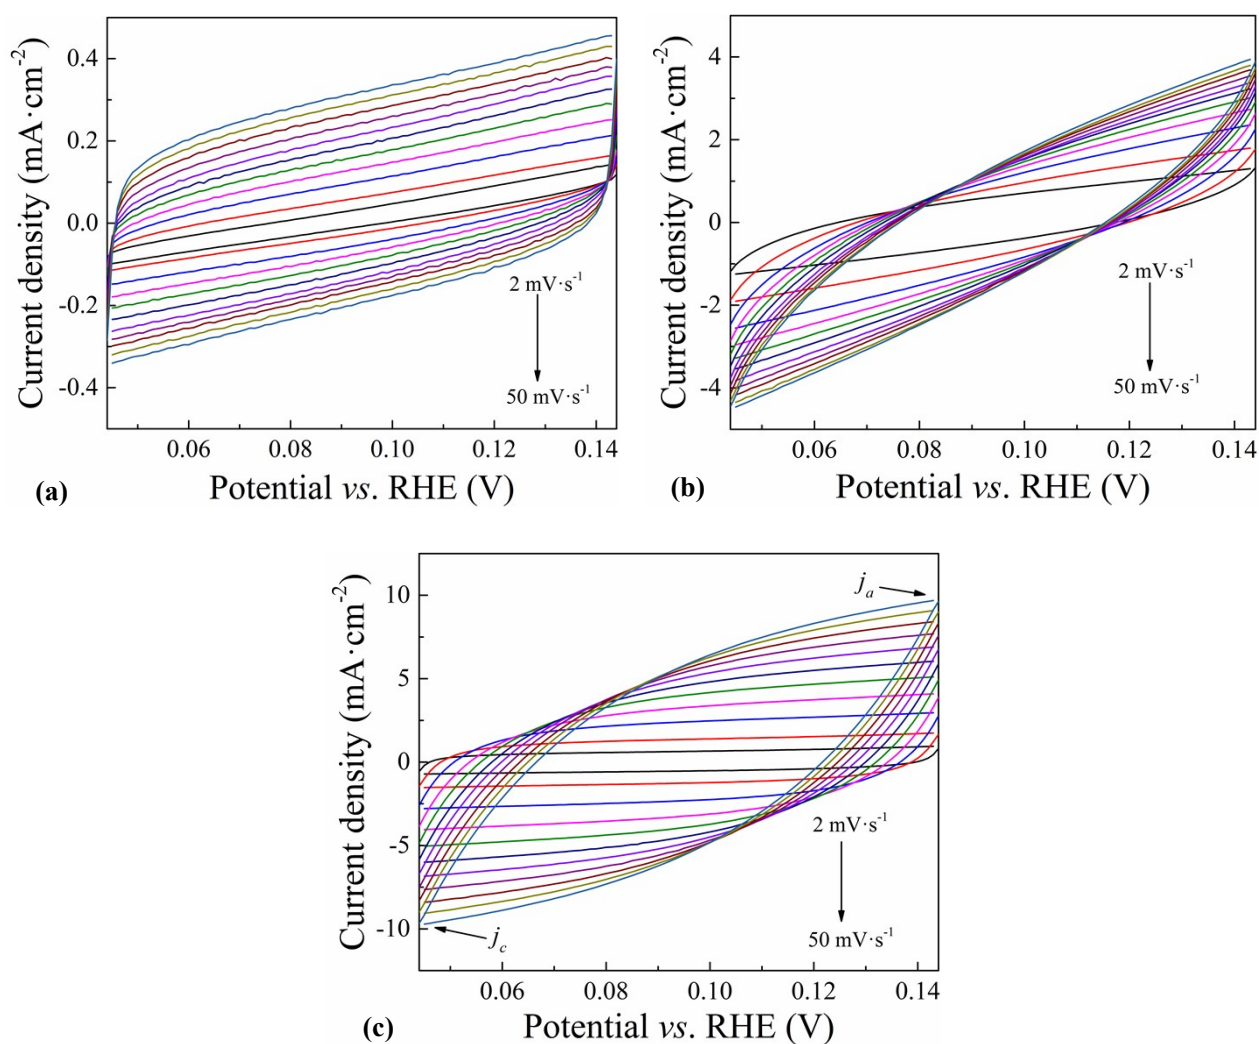

**Fig. S11** Cyclic voltammograms of (a) NiS NPs/CC, (b) MoS<sub>2</sub> NSs/CC and (c) NiS-MoS<sub>2</sub> HNSAs/CC in a potential range near the HER. Electrolyte: 1 mol·L<sup>-1</sup> KOH aqueous solution.

In order to estimate the HER-related electrochemical active surface area (EASA) of NiS NPs/CC, MoS<sub>2</sub> NSs/CC and NiS-MoS<sub>2</sub> HNSAs/CC, the CV curves were swept at a potential range of no faradic processes in different scan rates. The current densities at the average potential ( $\Delta j/2 = (j_a - j_c)/2$ ) in the selected range were plotted as a function of the scan rate, and the slope of the linear fit could be calculated as the  $C_{dl}$ . From **Fig. S11**, it is seen that the NiS-MoS<sub>2</sub> HNSAs/CC shows larger  $j_a$  and  $j_c$  values than the NiS NPs/CC and MoS<sub>2</sub> NSs/CC, implying that the NiS-MoS<sub>2</sub> HNSAs/CC possesses the largest  $C_{dl}$  value and thus the largest EASA.

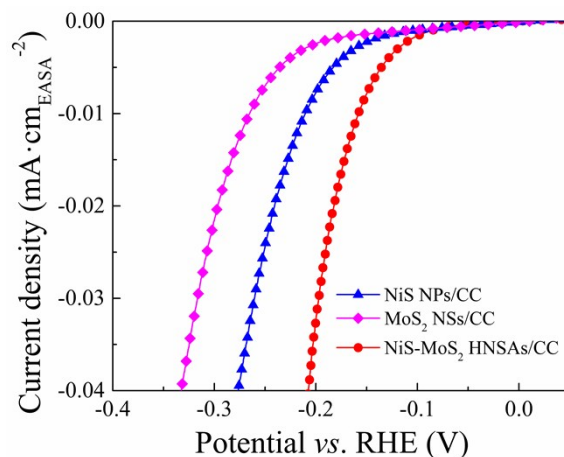

**Fig. S12 Polarization curves** of the NiS NPs/CC, MoS<sub>2</sub> NSs/CC and NiS-MoS<sub>2</sub> HNSAs/CC after normalizing the current by the corresponding EASA.

The specific HER activity of the samples could be estimated by normalizing the current by the corresponding EASA. From **Fig. S12**, it can be seen that the NiS-MoS<sub>2</sub> HNSAs/CC exhibits the lowest overpotential for HER among these three samples, indicating its highest intrinsic HER activity. Interestingly, being different from the polarization curves shown in Fig. 4a, the NiS NPs/CC shows better performance for HER than the MoS<sub>2</sub> NSs/CC after normalization. This result suggests that there would be much more active sites on the NiS NPs/CC as compared to those on the MoS<sub>2</sub> NSs/CC with the same EASA, which might be owing to the fact that the active sites of MoS<sub>2</sub> only exist in its edge domain.

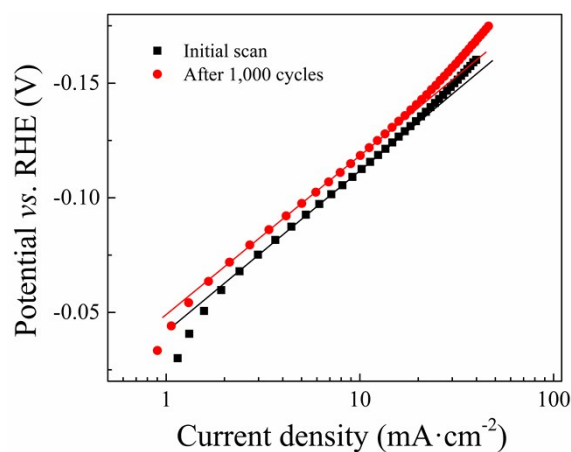

**Fig. S13 Tafel plots** of the NiS-MoS<sub>2</sub> HNSAs/CC before and after 1,000 CV scans for HER.

From this figure, it is seen that after 1,000 CV scans for HER, the Tafel slope of the NiS-MoS<sub>2</sub> HNSAs/CC almost equals to that of the initial scan, indicating that the mechanism for HER is not changed during 1,000 cycles, implying that the composition of the NiS-MoS<sub>2</sub> HNSAs/CC presents no change after this cycling test. Therefore, the slight increase of the overpotential for HER might be caused by the structure failure of the catalysts.

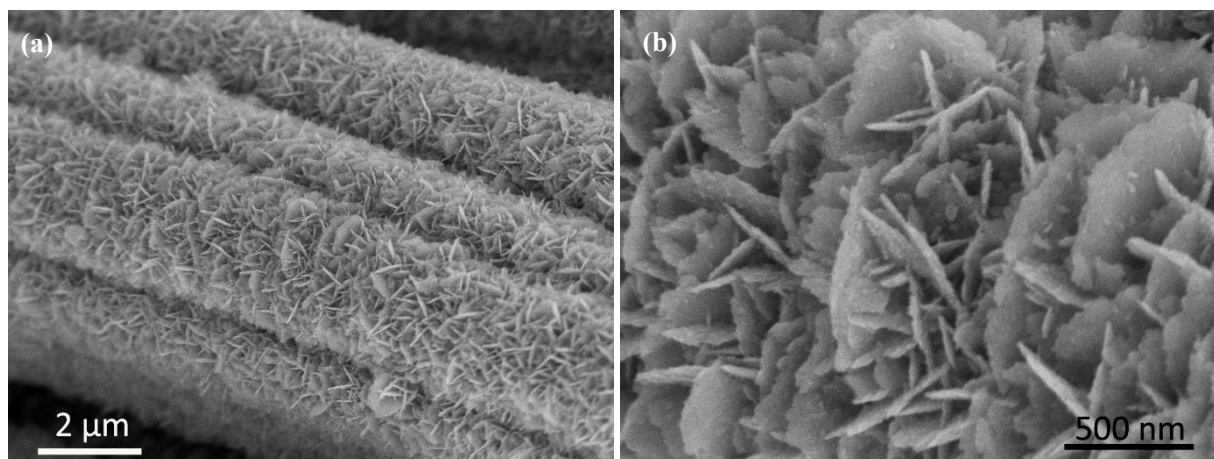

**Fig. S14 Microstructure after HER test.** (a) Low- and (b) high-magnification SEM images of NiS-MoS<sub>2</sub> HNSAs/CC after 24 h electrocatalytic HER. Electrolyte: 1 mol·L<sup>-1</sup> KOH aqueous solution; and current density: - 10 mA·cm<sup>-2</sup>.

It can be seen from **Fig. S14** that after a long-term electrocatalytic HER test (24 h), there are no significant changes in morphology for the present NiS-MoS<sub>2</sub> HNSAs/CC.

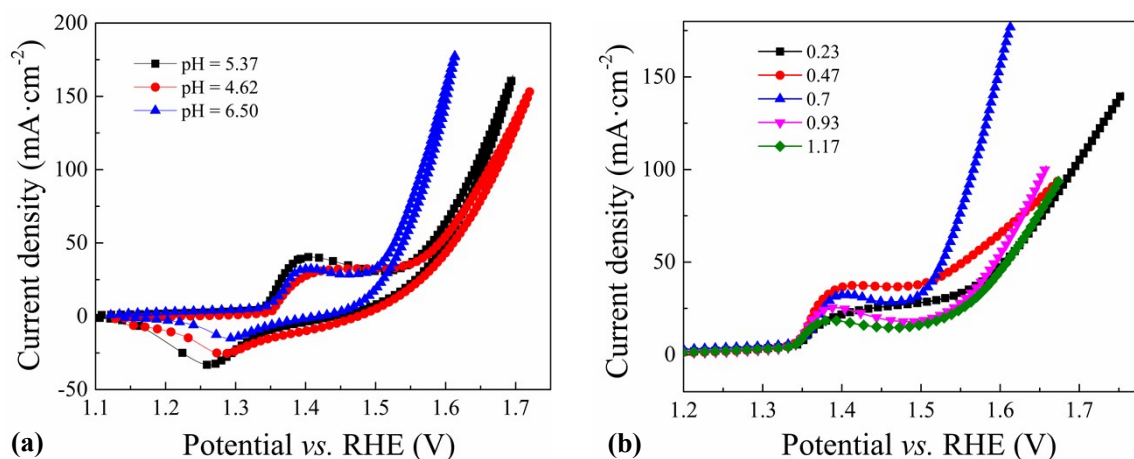

**Fig. S15 CV curves** of the NiS-MoS<sub>2</sub> nanostructures on CC synthesized at different pH values (a) and with different Mo/Ni feed molar ratios (b), respectively. Electrolyte: 1 mol·L<sup>-1</sup> KOH aqueous solution; and scan rate: 5 mV·s<sup>-1</sup>.

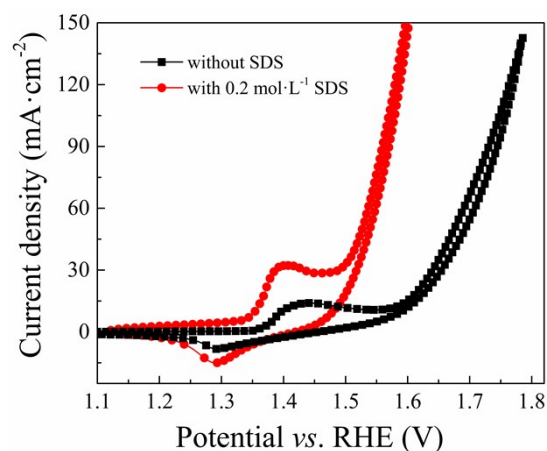

**Fig. S16 CV curves** of the NiS-MoS<sub>2</sub> nanostructures on CC synthesized with and without SDS. Electrolyte: 1 mol·L<sup>-1</sup> KOH aqueous solution; and scan rate: 5 mV·s<sup>-1</sup>.

As shown in **Fig. S15** and **S16**, the NiS-MoS<sub>2</sub>/CC nanostructures synthesized under the optimal conditions (pH = 6.50, SDS = 0.2 mol·L<sup>-1</sup> and Mo/Ni feed molar ratio of 0.7) present the highest performance for oxygen evolution reaction (OER), which is similar with the case for HER.



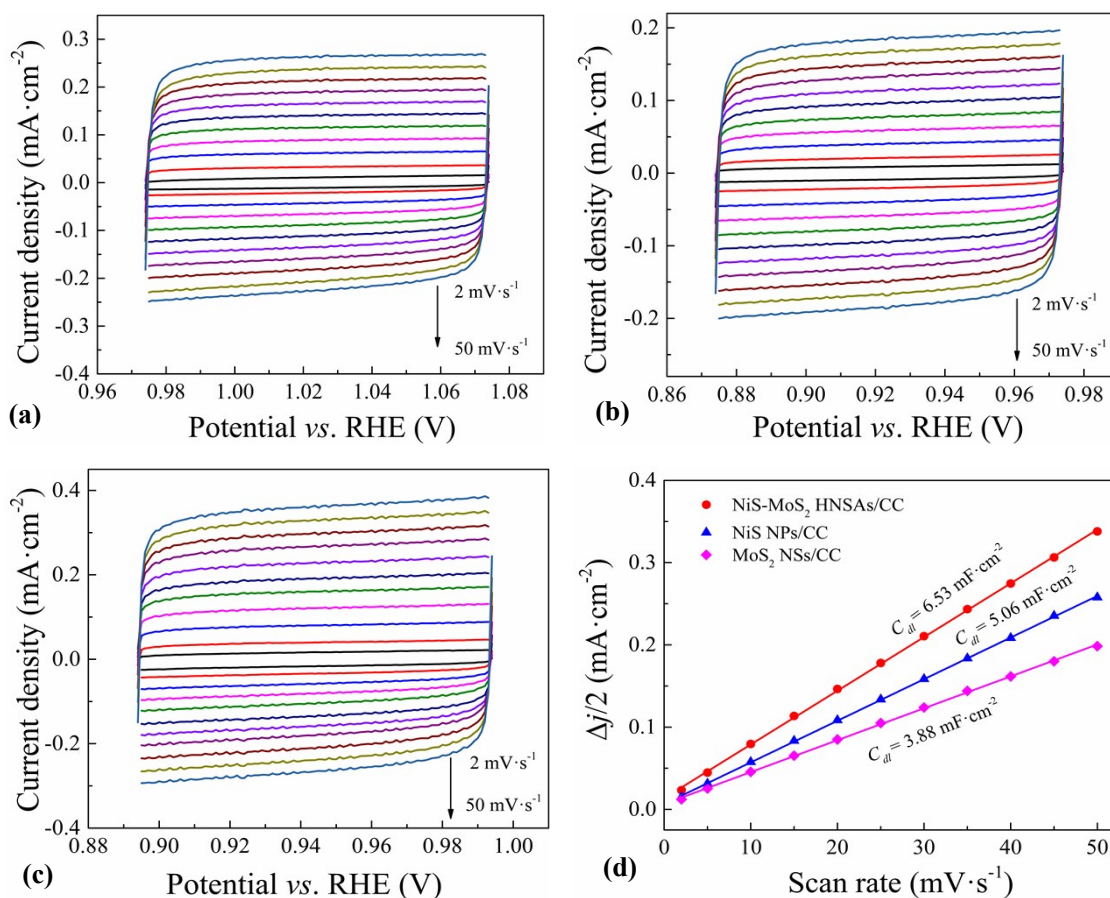

**Fig. S17 Estimation of the OER-related EASA.** Cyclic voltammograms of NiS NPs/CC (a), MoS<sub>2</sub> NSs/CC (b) and NiS-MoS<sub>2</sub> HNSAs/CC (c) in a potential range near the OER. (d) The fitting plots of  $C_{dl}$  for the three samples.

Similar with the HER test, the OER-related EASA value of the catalysts can be also evaluated *via* the CV curves by selecting the potential range for OER without the faradic processes. From the CV curves shown in **Fig. S17a-c**, the  $C_{dl}$  values of the NiS NPs/CC, MoS<sub>2</sub> NSs/CC and NiS-MoS<sub>2</sub> HNSAs/CC were calculated as 5.06, 3.88 and 6.53 mF·cm<sup>-2</sup> (**Fig. S17d**), corresponding to their EASA values of 126.5, 91.0 and 163.2 cm<sup>2</sup>, respectively. The NiS-MoS<sub>2</sub> HNSAs/CC has the highest EASA value, indicating its highest specific surface area.

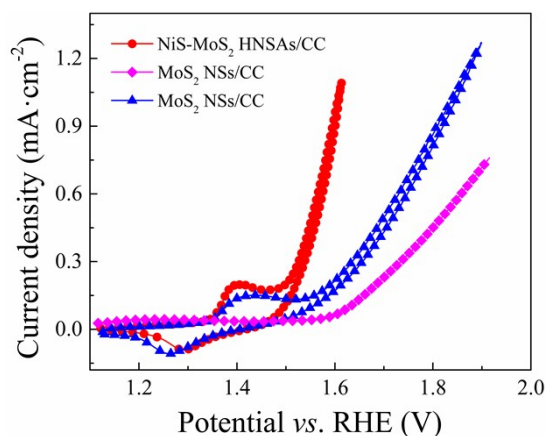

**Fig. S18** CV curves of the NiS NPs/CC, MoS<sub>2</sub> NSs/CC and NiS-MoS<sub>2</sub> HNSAs/CC after normalizing the current by the corresponding EASA.

It is seen that even if the current is normalized by the corresponding EASA, the performance of the NiS-MoS<sub>2</sub> HNSAs/CC is still significantly better than its counterparts (the NiS NPs/CC and MoS<sub>2</sub> NSs/CC), suggesting the highest intrinsic OER activity of such NiS-MoS<sub>2</sub> heterogeneous nanostructures.

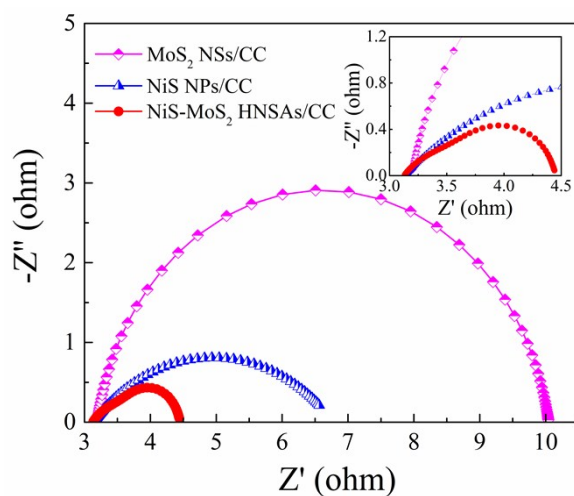

**Fig. S19** EIS Nyquist plots of NiS NPs/CC, MoS<sub>2</sub> NSs/CC and NiS-MoS<sub>2</sub> HNSAs/CC for OER, where the inset shows the enlarged view at the range of high frequency. Electrolyte: 1 mol·L<sup>-1</sup> KOH aqueous solution. And the results were measured at 0.75 V vs. Hg/HgO.

From **Fig. S19** it can be seen that, all the electrodes show small and similar series resistance ( $R_s$ ) about 3.2 Ohm; but the present NiS-MoS<sub>2</sub> HNSAs/CC possesses the lowest charge transfer resistance ( $R_{ct}$ ). This result indicates the fastest electrochemical reaction rate on the surface of NiS-MoS<sub>2</sub> HNSAs/CC. Furthermore, similar with the EIS Nyquist plots for HER, two capacitive semicircles with different curvatures are also displayed in the present NiS-MoS<sub>2</sub> HNSAs/CC, revealing that there are two different electrochemical reaction surfaces (NiS and MoS<sub>2</sub>) during the OER process. And both capacitive semicircles show a lower  $R_{ct}$  than those of NiS NPs/CC and MoS<sub>2</sub> NSs/CC, suggesting there is a synergistic effect between NiS and MoS<sub>2</sub>.

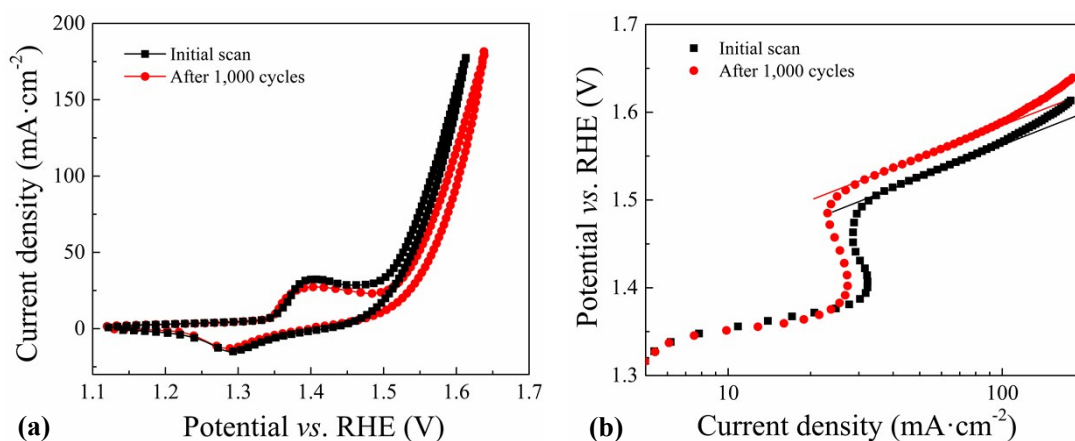

**Fig. S20** CV curves (a) and Tafel plots (b) of the NiS-MoS<sub>2</sub> HNSAs/CC before and after 1,000 cycles for OER.

Similar with the HER test, only a slight increase (< 10%) in overpotential could be detected after 1,000 cycles test for OER, and the Tafel slope was almost kept as that in the initial scan, revealing an excellent cycling stability of the NiS-MoS<sub>2</sub> HNSAs/CC for OER.

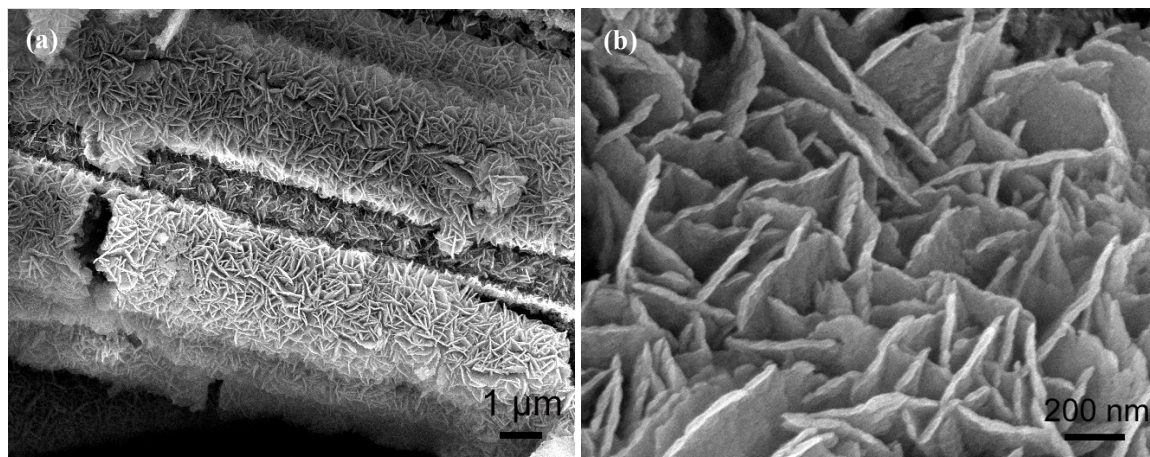

**Fig. S21 Microstructure after OER test.** (a) Low- and (b) high-magnification SEM images of NiS-MoS<sub>2</sub> HNSAs/CC after 24 h electrocatalytic OER test. Electrolyte: 1 mol·L<sup>-1</sup> KOH aqueous solution; and current density: 10 mA·cm<sup>-2</sup>.

From **Fig. S21**, it can be seen that despite of the drastic redox reaction over NiS during the OER process, the morphology of the NiS-MoS<sub>2</sub> HNSAs catalyst was changed slightly after a long-term test (24 h). The diameter of a single fiber might be expanded somewhat, but the aligned structure of the nanosheets was changed very little.

**Table S1.** Elemental contents on the surface of the NiS-MoS<sub>2</sub> HNSAs/CC (detected by XPS)

| Elements | At. %  |
|----------|--------|
| S 2p     | 26.084 |
| Mo3d S2s | 15.306 |
| C 1s     | 29.776 |
| O 1s     | 22.868 |
| Ni 2p    | 5.966  |

**Table S2.** Comparison on the HER performance of the present NiS-MoS<sub>2</sub> HNSAs/CC with other reported noble-metal free electrocatalysts in alkaline media

| Catalysts <sup>a</sup>                                              | $\eta_{10}$ (mV) | $\eta_{\text{onset}}$ (mV) | Tafel slope (mV·dec <sup>-1</sup> ) | Electrolyte <sup>b</sup> | Ref.      |
|---------------------------------------------------------------------|------------------|----------------------------|-------------------------------------|--------------------------|-----------|
| NiS-MoS <sub>2</sub> HNSAs/CC                                       | 106              | 51                         | 56.7                                | 1.0 M KOH                | This work |
| NiFeO <sub>x</sub> on carbon fiber paper                            | 88               | 40                         | 150                                 | 1.0 M KOH                | 7         |
| Porous MoO <sub>2</sub> nanosheets/NF                               | 27               | ~ 0                        | 41                                  | 1.0 M KOH                | 8         |
| Amorphous Ni-Co complexes with 1T phase MoS <sub>2</sub>            | 70               | -                          | 38.1                                | 1.0 M KOH                | 14        |
| NiS <sub>2</sub> /MoS <sub>2</sub> hybrid nanowire                  | 204              | 134                        | 65                                  | 1.0 M KOH                | 17        |
| Ni <sub>3</sub> S <sub>2</sub> nanosheet arrays/NF                  | 223              | -                          | -                                   | 1.0 M NaOH               | 21        |
| MoS <sub>2</sub> /Ni <sub>3</sub> S <sub>2</sub> nanostructures /NF | 110              | 50                         | 83                                  | 1.0 M KOH                | 22        |
| MoS <sub>2</sub> -Ni <sub>3</sub> S <sub>2</sub> heteronanorods/NF  | 98               | 31                         | 61                                  | 1.0 M KOH                | 23        |
| MoS <sub>2</sub> /NiS nanocuboids/NF                                | 92               | -                          | 113                                 | 1.0 M KOH                | 24        |
| NiSe nanowires/NF                                                   | 96               | -                          | 120                                 | 1.0 M KOH                | S1        |
| Ni-Fe/nitrogen doped nanocarbon                                     | 219              | -                          | 101                                 | 1.0 M KOH                | S2        |
| Mo <sub>2</sub> N-Mo <sub>2</sub> C/HGr                             | 154              | 18                         | 68                                  | 1.0 M KOH                | S3        |
| NiCu@C                                                              | 94               | -                          | 74                                  | -                        | S4        |
| Ni <sub>2</sub> P@NPCNFs                                            | 104.2            | -                          | 79.7                                | 1.0 M KOH                | S5        |
| CP/CTs/Co-S                                                         | 190              | -                          | 131                                 | 1.0 M KOH                | S6        |
| NiMo HNRs/Ti mesh                                                   | 92               | 60                         | 76                                  | 1.0 M KOH                | S7        |
| NiCo <sub>2</sub> O <sub>4</sub> hollow microcuboids                | 110              | 50                         | 49.7                                | 1.0 M NaOH               | S8        |
| Co/N, B-doped carbon                                                | 183              | -                          | 73.2                                | 1.0 M KOH                | S9        |
| N-doped porous MoC nanobelts                                        | 110              | 52                         | 49.7                                | 1.0 M KOH                | S10       |

a) C: carbon; NF: nickel foam

b) M: mol·L<sup>-1</sup>

**Table S3.** Comparison on the OER performance of the present NiS-MoS<sub>2</sub> HNSAs/CC with other reported noble-metal free electrocatalysts in alkaline media

| Catalysts                                                           | $\eta_{10}$ (mV) | Tafel slope (mV·dec <sup>-1</sup> ) | Electrolyte | Ref.      |
|---------------------------------------------------------------------|------------------|-------------------------------------|-------------|-----------|
| NiS-MoS <sub>2</sub> HNSAs/CC                                       | 203              | 77.4                                | 1.0 M KOH   | This work |
| NiFeO <sub>x</sub> /CFP                                             | ~ 230            | 31.5                                | 1.0 M KOH   | 7         |
| Porous MoO <sub>2</sub> nanosheets/NF                               | 260              | 54                                  | 1.0 M KOH   | 8         |
| Amorphous Ni-Co complexes with 1T phase MoS <sub>2</sub>            | 235              | 45.7                                | 1.0 M KOH   | 14        |
| Ni <sub>3</sub> S <sub>2</sub> nanosheet arrays /NF                 | 260              | -                                   | 1.0 M NaOH  | 21        |
| MoS <sub>2</sub> /Ni <sub>3</sub> S <sub>2</sub> nanostructures/ NF | 218              | 88                                  | 1.0 M KOH   | 22        |
| MoS <sub>2</sub> -Ni <sub>3</sub> S <sub>2</sub> heteronanorods/NF  | 249              | 66                                  | 1.0 M KOH   | 23        |
| MoS <sub>2</sub> /NiS nanocuboids/NF                                | 271@ $\eta_{15}$ | 53                                  | 1.0 M KOH   | 24        |
| Ni-Fe/nitrogen doped nanocarbon                                     | 330              | 45                                  | 1.0 M KOH   | S2        |
| CP/CTs/Co-S                                                         | 306              | 72                                  | 1.0 M KOH   | S6        |
| NiMo HNRs/Ti mesh                                                   | 310              | 47                                  | 1.0 M KOH   | S7        |
| NiCo <sub>2</sub> O <sub>4</sub> hollow microcuboids                | 290              | 53                                  | 1.0 M NaOH  | S8        |
| Ni <sub>3</sub> S <sub>2</sub> nanorods/NF                          | 187              | 157                                 | 0.1 M KOH   | S11       |
| NiFe LDHs                                                           | ~300             | 40                                  | 1.0 M KOH   | S12       |
| Fe decorated porous Ni-Cd                                           | 290              | 38                                  | 0.1 M NaOH  | S13       |
| Ni-MnO/rGO                                                          | 370              | 67                                  | 0.1 M KOH   | S14       |
| Fe/Ni <sub>2.4</sub> /Co <sub>0.4</sub> -MIL-53                     | 219              | 53.5                                | 1.0 M KOH   | S15       |
| Ni-Fe LDH hollow nanoprism                                          | 280              | 49.4                                | 1.0 M KOH   | S16       |



**Table S4.** Comparison on the overall water splitting performance of the present NiS-MoS<sub>2</sub> HNSAs/CC with recently reported noble-metal free bi-functional electrocatalysts in alkaline media

| Catalysts                                                          | HER $\eta_{10}$<br>(mV) | OER $\eta_{10}$<br>(mV) | Overall water<br>splitting cell<br>voltage (V, at<br>10 mA·cm <sup>-2</sup> ) | Electrolyte | Ref.      |
|--------------------------------------------------------------------|-------------------------|-------------------------|-------------------------------------------------------------------------------|-------------|-----------|
| NiS-MoS <sub>2</sub> HNSAs/CC                                      | 106                     | 203                     | 1.54                                                                          | 1.0 M KOH   | This work |
| NiFeO <sub>x</sub> /CFP                                            | 88                      | ~230                    | 1.51                                                                          | 1.0 M KOH   | 7         |
| Porous MoO <sub>2</sub> nanosheets/NF                              | 27                      | 260                     | 1.52                                                                          | 1.0 M KOH   | 8         |
| Amorphous Ni-Co complexes with<br>1T phase MoS <sub>2</sub>        | 70                      | 235                     | 1.48                                                                          | 1.0 M KOH   | 14        |
| NiS microspheres film/NF                                           | -                       | -                       | 1.64                                                                          | 1.0 M KOH   | 19        |
| Ni <sub>3</sub> S <sub>2</sub> nanosheet arrays/NF                 | 223                     | 260                     | ~1.76                                                                         | 1.0 M NaOH  | 21        |
| MoS <sub>2</sub> /Ni <sub>3</sub> S <sub>2</sub> nanostructures/NF | 110                     | 218                     | 1.56                                                                          | 1.0 M KOH   | 22        |
| MoS <sub>2</sub> -Ni <sub>3</sub> S <sub>2</sub> heteronanorods/NF | 98                      | 249                     | 1.50                                                                          | 1.0 M KOH   | 23        |
| MoS <sub>2</sub> /NiS nanocuboids/NF                               | 92                      | 271@ $\eta_{15}$        | 1.61                                                                          | 1.0 M KOH   | 24        |
| Ni <sub>3</sub> N-NiMoN heterostructures                           | 31                      | 277                     | 1.54                                                                          | 1.0 M KOH   | 47        |
| Ni-Fe-O nanowire network                                           | -                       | 244                     | 1.64                                                                          | 1.0 M KOH   | 48        |
| NiSe nanowires/NF                                                  | 96                      | -                       | 1.63                                                                          | 1.0 M KOH   | S1        |
| Ni-Fe/nitrogen doped nanocarbon                                    | 219                     | 330                     | 1.58                                                                          | 1.0 M KOH   | S2        |
| CP/CTs/Co-S                                                        | 190                     | 306                     | 1.743                                                                         | 1.0 M KOH   | S6        |
| NiMo HNRs/Ti mesh                                                  | 92                      | 310                     | 1.64                                                                          | 1.0 M KOH   | S7        |
| NiCo <sub>2</sub> O <sub>4</sub> hollow microcuboids               | 110                     | 290                     | 1.65                                                                          | 1.0 M NaOH  | S8        |
| CoP/NCNHP                                                          | 115                     | 310                     | 1.64                                                                          | 1.0 M KOH   | S17       |
| Ni <sub>3</sub> N-NiMoN heterostructures                           | 31                      | 277                     | 1.54                                                                          | 1.0 M KOH   | S18       |

**Table S5.** The theoretical amounts, measured amounts and Faradaic efficiencies of HER and OER at different stages over the NiS-MoS<sub>2</sub> HNSAs/CC.

| Time (min) | Theoretical amount ( $\mu\text{mol}$ ) |       | Measured amount ( $\mu\text{mol}$ ) |       | Faraday efficiency (%) |      |
|------------|----------------------------------------|-------|-------------------------------------|-------|------------------------|------|
|            | HER                                    | OER   | HER                                 | OER   | HER                    | OER  |
| 5          | 15.55                                  | 7.77  | 14.35                               | 6.98  | 92.3                   | 89.8 |
| 10         | 31.09                                  | 15.55 | 30.63                               | 14.36 | 98.5                   | 92.3 |
| 15         | 46.64                                  | 23.32 | 46.53                               | 21.54 | 99.8                   | 92.4 |
| 20         | 62.18                                  | 31.09 | 61.92                               | 28.78 | 99.6                   | 92.6 |
| 25         | 77.73                                  | 38.87 | 76.62                               | 36.13 | 98.6                   | 93   |
| 30         | 93.28                                  | 46.64 | 92.69                               | 43.12 | 99.4                   | 92.4 |
| 35         | 108.82                                 | 54.41 | 108.46                              | 50.68 | 99.7                   | 93.1 |
| 40         | 124.37                                 | 62.18 | 123.58                              | 57.99 | 99.4                   | 93.3 |
| 45         | 139.92                                 | 69.96 | 139.78                              | 65.38 | 99.9                   | 93.4 |
| 50         | 155.46                                 | 77.73 | 155.16                              | 72.17 | 99.8                   | 92.8 |
| 55         | 171.01                                 | 85.5  | 169.66                              | 79.74 | 99.2                   | 93.3 |
| 60         | 186.56                                 | 93.27 | 186.05                              | 87.18 | 99.7                   | 93.5 |

### Note S1. Calculations of Faraday efficiency

Firstly, the theoretical value ( $V_T$ ) of H<sub>2</sub> and O<sub>2</sub> can be calculated based on the following formula,

$$V_T = \frac{I \times t}{F \times n_e} \quad (\text{S1})$$

where  $I$  is the current (A) applied on the electrodes,  $t$  is the reaction time (s), and  $F$  is the Faraday constant. And  $n_e$  is the transferred electron number corresponding to the generation of every H<sub>2</sub> or O<sub>2</sub> molecule, which can be determined by the water splitting reactions in alkaline solution,<sup>9</sup>

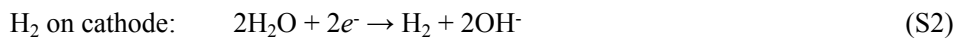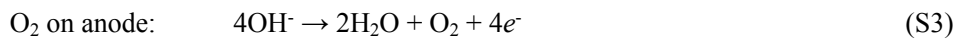

Thus, the  $n_e$  values for H<sub>2</sub> and O<sub>2</sub> are 2 and 4, respectively.

Finally, the Faraday efficiency ( $e_F$ ) can be calculated using the following formula,

$$e_F = \frac{V_M}{V_T} \times 100\% \quad (\text{S4})$$

in which,  $V_M$  is the measured amount of H<sub>2</sub> or O<sub>2</sub>.

## References

- S1 C. Tang, N. Y. Cheng, Z. H. Pu, W. Xing and X. P. Sun, *Angew. Chem. Int. Edit.*, 2015, **54**, 9351-9355.
- S2 X. Zhang, H. M. Xu, X. X. Li, Y. Y. Li, T. B. Yang and Y. Y. Liang, *ACS Catal.*, 2016, **6**, 580-588.
- S3 H. J. Yan, Y. Xie, Y. Q. Jiao, A. P. Wu, C. G. Tian, X. M. Zhang, L. Wang and H. G. Fu, *Adv. Mater.*, 2018, **30**, 1704156.
- S4 Y. Shen, Y. F. Zhou, D. Wang, X. Wu, J. Li and J. Y. Xi, *Adv. Energy Mater.*, 2018, **8**, 1701759.
- S5 M. Q. Wang, C. Ye, H. Liu, M. W. Xu and S. J. Bao, *Angew. Chem. Int. Edit.*, 2018, **57**, 1963-1967.
- S6 J. Wang, H. X. Zhong, Z. L. Wang, F. L. Meng and X. B. Zhang, *ACS Nano*, 2016, **10**, 2342-2348.
- S7 J. Q. Tian, N. Y. Cheng, Q. Liu, X. P. Sun, Y. Q. He and A. M. Asiri, *J. Mater. Chem. A*, 2015, **3**, 20056-20059.
- S8 X. H. Gao, H. X. Zhang, Q. G. Li, X. G. Yu, Z. L. Hong, X. W. Zhang, C. D. Liang and Z. Lin, *Angew. Chem. Int. Edit.*, 2016, **55**, 6290-6294.
- S9 H. B. Zhang, Z. J. Ma, J. J. Duan, H. M. Liu, G. G. Liu, T. Wang, K. Chang, M. Li, L. Shi, X. G. Meng, K. C. Wu and J. H. Ye, *ACS Nano*, 2016, **10**, 684-694.
- S10 S. Y. Jing, L. S. Zhang, L. Luo, J. J. Lu, S. B. Yin, P. K. Shen and P. Tsiakaras, *Appl. Catal. B-Environ.*, 2018, **224**, 533-540.
- S11 W. J. Zhou, X. J. Wu, X. H. Cao, X. Huang, C. L. Tan, J. Tian, H. Liu, J. Y. Wang and H. Zhang, *Energy Environ. Sci.*, 2013, **6**, 2921-2924.
- S12 F. Song and X. L. Hu, *Nat. Commun.*, 2014, **5**, 4477.
- S13 J. H. Kim, D. H. Youn, K. Kawashima, J. Lin, H. Lim and C. B. Mullins, *Appl. Catal. B-Environ.*, 2018, **225**, 1-7.
- S14 G. T. Fu, X. X. Yan, Y. F. Chen, L. Xu, D. M. Sun, J. M. Lee and Y. W. Tang, *Adv. Mater.*, 2018, **30**, 1704609.

- S15 F. L. Li, Q. Shao, X. Q. Huang and J. P. Lang, *Angew. Chem. Int. Edit.*, 2018, **57**, 1888-1892.
- S16 L. Yu, J. F. Yang, B. Y. Guan, Y. Lu and X. W. Lou, *Angew. Chem. Int. Edit.*, 2018, **57**, 172-176.
- S17 Y. Pan, K. A. Sun, S. J. Liu, X. Cao, K. L. Wu, W. C. Cheong, Z. Chen, Y. Wang, Y. Li, Y. Q. Liu, D. S. Wang, Q. Peng, C. Chen and Y. D. Li, *J. Am. Chem. Soc.*, 2018, **140**, 2610-2618.
- S18 A. P. Wu, Y. Xie, H. Ma, C. G. Tian, Y. Gu, H. J. Yan, X. M. Zhang, G. Y. Yang and H. G. Fu, *Nano Energy*, 2018, **44**, 353-363.
